# Supplementary material
Source: PubMed Central journal article supplement (PMC5710550)
Supplement: jamapsychiatry-74-798-s001.pdf [file jamapsychiatry-74-798-s001.pdf]

## Supplementary Online Content

Slade EP, Jahn DR, Regenold WT, Case BG. Association of electroconvulsive therapy with psychiatric readmissions in US hospitals. *JAMA Psychiatry*. Published online June 28, 2017.  
doi:10.1001/jamapsychiatry.2017.1378

**eAppendix 1.** Bivariate Probit Model

**eAppendix 2.** Sensitivity Analyses

**eTable 1.** Bivariate Results

**eTable 2.** Probit Regression Estimates of the Likelihood of 30-Day Readmission

**eTable 3.** One-to-One Propensity Score Matching Estimate of the Average Treatment Effect of ECT on 30-Day Readmission Risk (N=4,940)

**eTable 4.** Thirty-Day Readmission Risk by Hospital ECT Prevalence Among Inpatients Who Were Not Administered ECT and Did Not Have a Major Depressive Disorder, Bipolar Disorder, or Schizoaffective Disorder Diagnosis

This supplementary material has been provided by the authors to give readers additional information about their work.

## eAppendix 1. Bivariate Probit Model

Adjusted relative risk ratios (21) of psychiatric inpatient readmission for individuals administered ECT compared to individuals not administered ECT were estimated using the following IV model specification of the bivariate probit regression model (12):

$$(1a) \quad Y_1 = 1[\mathbf{X}_1\boldsymbol{\beta}_1 + \delta Y_2 + \varepsilon_1 > 0],$$

$$(1b) \quad Y_2 = 1[\mathbf{X}_2\boldsymbol{\beta}_2 + \varepsilon_2 > 0],$$

$$\text{where } \begin{bmatrix} \varepsilon_1 \\ \varepsilon_2 \end{bmatrix} | \mathbf{X} \sim \mathcal{N} \left( \begin{bmatrix} 0 \\ 0 \end{bmatrix}, \begin{bmatrix} 1 & \rho \\ \rho & 1 \end{bmatrix} \right),$$

where  $Y_1$  is a binary indicator for readmission;  $Y_2$  is a binary indicator for ECT administration;  $\mathbf{X}_1$  and  $\mathbf{X}_2$  are sets of covariates;  $\boldsymbol{\beta}_1$ ,  $\boldsymbol{\beta}_2$  and  $\delta$  are parameters to be estimated;  $\varepsilon_1$  and  $\varepsilon_2$  are error terms;  $\mathcal{N}$  represents the bivariate standard normal distribution; and  $\rho$  is the correlation between  $\varepsilon_1$  and  $\varepsilon_2$ .  $\delta$  represents the effect of ECT administration on readmission risk. Equations 1a and 1b are estimated jointly, and in doing so  $Y_2$  in Equation 1a is replaced by its estimated probability, which is estimated using Equation 1b. This estimated probability conceptually represents the likelihood of being offered ECT. IV estimates of  $\delta$ —the effect of greater availability of ECT—are consistent even in the presence of unmeasured confounders if  $\mathbf{X}_2$  contains one or more variables (called instrumental variables or *instruments*) that are correlated with  $Y_2$  but are not correlated with  $\varepsilon_1$ , conditional on  $\mathbf{X}_1$  (12-14). The key IV in this study was a hospital's mean proportion of inpatients that are treated with ECT. The conceptual rationale for this instrument being a valid instrument is that ECT's level of availability to a particular patient is driven by attributes of the treating hospital and its geographic location, such as the restrictiveness of state regulations governing treatment with ECT, and these factors are presumed to be largely independent of a patient's illness severity or clinical need for ECT. The statistical significance of  $\rho$  can be used as a specification test of the ordinary probit and propensity score matching regression specifications, which require for internal validity that  $\rho = \text{corr}(\varepsilon_1, \varepsilon_2) = 0$ .

## **eAppendix 2. Sensitivity Analyses**

In supplemental sensitivity analyses, regression models were run using ordinary probit regression and using one-to-one propensity score matching (see eTable 2. By contrast to the IV probit method, ordinary probit regression estimates and propensity score matching estimates of treatment effects are biased and inconsistent if the set of measured covariates omits any factors that are correlated with both ECT treatment and readmission risk. To test the sensitivity of the IV findings to hospital-level unmeasured confounders, IV probit regressions were also estimated using state-level prevalence of ECT delivery, rather than hospital-level ECT prevalence, as the identifying instrument. Finally, we examined whether hospital propensity to use ECT was correlated with readmission risk among psychiatric inpatients who did not have a MDD, bipolar disorder, or schizoaffective disorder diagnosis and were not administered ECT. A negative correlation between hospital propensity to use ECT and readmission risk among these inpatients, who are unlikely candidates for ECT administration, would cast doubt on a causal interpretation of our IV-probit estimates.

## eTable 1. Bivariate Results

Thirty-day psychiatric inpatient readmission rates among inpatients with affective disorders, by sample characteristics (weighted)<sup>a</sup>

|                                         | N       | Readmitted % | 95% CI    | F <sub>1,162672</sub> | P Value |
|-----------------------------------------|---------|--------------|-----------|-----------------------|---------|
| <b>Overall</b>                          | 162,691 | 12.2         | 11.9-12.4 |                       |         |
| <b>ECT delivered during stay</b>        |         |              |           |                       |         |
| No                                      | 160,205 | 12.2         | 11.9-12.5 | ref.                  |         |
| Yes                                     | 2,486   | 9.9          | 8.7-11.0  | 14.6                  | <0.001  |
| <b>Age (years)</b>                      |         |              |           |                       |         |
| 18-25                                   | 24,746  | 11.2         | 10.6-11.9 | ref.                  |         |
| 26-45                                   | 65,000  | 13.6         | 13.1-14.1 | 31.7                  | <0.001  |
| 46-64                                   | 56,542  | 12.2         | 11.8-12.7 | 5.6                   | 0.02    |
| 65-74                                   | 9,677   | 9.8          | 8.9-10.7  | 6.7                   | 0.01    |
| >74                                     | 6,726   | 8.3          | 7.3-9.3   | 23.1                  | <0.001  |
| <b>Gender</b>                           |         |              |           |                       |         |
| Male                                    | 72,036  | 13.3         | 12.9-13.7 | ref.                  |         |
| Female                                  | 90,655  | 11.2         | 10.9-11.6 | 54.2                  | <0.001  |
| <b>Race-ethnicity</b>                   |         |              |           |                       |         |
| White, non-Hispanic                     | 55,539  | 12.1         | 11.8-12.4 | ref.                  |         |
| Black, non-Hispanic                     | 21,715  | 12.9         | 12.2-13.6 | 3.7                   | 0.05    |
| Hispanic                                | 18,376  | 13.0         | 12.2-13.9 | 4.0                   | 0.05    |
| Other race-ethnicity                    | 15,448  | 10.6         | 9.8-11.4  | 11.6                  | 0.001   |
| <b>Diagnosis group</b>                  |         |              |           |                       |         |
| Major depressive disorder               | 68,287  | 9.5          | 9.2-9.9   | ref.                  |         |
| Bipolar disorder                        | 65,961  | 12.3         | 11.9-12.8 | 93.3                  | <0.001  |
| Schizoaffective disorder                | 28,443  | 15.0         | 14.4-15.6 | 217.4                 | <0.001  |
| <b>Substance use disorder diagnosis</b> |         |              |           |                       |         |
| No                                      | 98,426  | 11.6         | 11.3-12.0 | ref.                  |         |
| Yes                                     | 64,265  | 13.1         | 12.7-13.6 | 27.7                  | <0.001  |
| <b>Medical comorbidity<sup>b</sup></b>  |         |              |           |                       |         |
| No                                      | 122,713 | 11.7         | 11.4-12.0 | ref.                  |         |
| Yes                                     | 39,978  | 13.4         | 12.8-13.9 | 27.2                  | <0.001  |
| <b>Length-of-stay (days)</b>            |         |              |           |                       |         |
| 1-7                                     | 105,648 | 9.7          | 9.5-9.9   | ref.                  |         |
| 8-14                                    | 34,415  | 13.0         | 12.6-13.4 | 226.8                 | <0.001  |
| 9-21                                    | 11,667  | 14.4         | 13.7-15.1 | 170.3                 | <0.001  |
| 22-28                                   | 4,421   | 13.4         | 12.3-14.4 | 46.3                  | <0.001  |
| More than 28                            | 8,132   | 11.9         | 11.1-12.6 | 34.4                  | <0.001  |

| <b>Source of payment<sup>c</sup></b>       |         |      |           |       |        |
|--------------------------------------------|---------|------|-----------|-------|--------|
| Private insurance                          | 48,633  | 9.2  | 8.8-9.7   | ref.  |        |
| Medicare                                   | 47,884  | 13.5 | 13.0-14.0 | 168.4 | <0.001 |
| Medicaid                                   | 38,531  | 13.4 | 12.8-14.0 | 129.8 | <0.001 |
| Other insurance                            | 11,950  | 11.4 | 10.4-12.4 | 14.5  | <0.001 |
| Uninsured                                  | 15,693  | 10.1 | 9.2-10.9  | 3.1   | 0.08   |
| <b>Hospital type</b>                       |         |      |           |       |        |
| Urban, medium or large                     | 99,714  | 12.6 | 12.3-12.9 | ref.  |        |
| Urban, small                               | 44,771  | 11.2 | 10.7-11.7 | 20.7  | <0.001 |
| Non-urban                                  | 15,173  | 9.7  | 8.9-10.5  | 43.0  | <0.001 |
| Unknown location                           | 3,033   | 17.6 | 15.5-19.8 | 20.5  | <0.001 |
| <b>Hospital delivers any inpatient ECT</b> |         |      |           |       |        |
| No                                         | 100,638 | 13.0 | 12.6-13.3 | ref.  |        |
| Yes                                        | 63,677  | 11.0 | 10.5-11.4 | 54.7  | <0.001 |

<sup>a</sup> See Methods for a description of the weighting procedure

<sup>b</sup> Equals 1 if the patient had an ICD-9 diagnosis code in any position for intracranial lesions/ masses/ inflammation/ infection/ hemorrhage, hemorrhagic stroke, myocardial infarction, dysrhythmias, malfunctioning cardiac device, valvular disease, heart failure, epilepsy, dementia, and other contraindications to anesthesia; 0 otherwise.

<sup>c</sup>Represents primary source of payment

**eTable 2. Probit Regression Estimates of the Likelihood of 30-Day Readmission<sup>a</sup>**

|                                                         | Ordinary Probit |       |         |         |        | IV Probit |       |         |         |        |
|---------------------------------------------------------|-----------------|-------|---------|---------|--------|-----------|-------|---------|---------|--------|
|                                                         | coef            | z     | P Value | 95% CI  |        | coef      | z     | P Value | 95% CI  |        |
| <b>ECT delivered during stay</b>                        | 0.020           | 0.53  | 0.60    | -0.054  | 0.093  | -0.309    | -2.29 | 0.02    | -0.573  | -0.045 |
| <b>Age</b>                                              | 0.012           | 5.61  | <0.001  | 0.008 - | 0.016  | 0.012     | 5.60  | <0.001  | 0.008 - | 0.016  |
| <b>Age<sup>2</sup>/1000</b>                             | -0.155          | -6.77 | <0.001  | -0.200  | -0.110 | -0.154    | -6.70 | <0.001  | -0.199  | -0.109 |
| <b>Female</b>                                           | -0.070          | -5.06 | <0.001  | -0.098  | -0.043 | -0.070    | -5.02 | <0.001  | -0.097  | -0.043 |
| <b>Race-ethnicity (ref: white, non-Hispanic)</b>        |                 |       |         |         |        |           |       |         |         |        |
| Black non-Hispanic                                      | -0.027          | -1.31 | 0.19    | -0.067  | 0.013  | -0.029    | -1.44 | 0.15    | -0.069  | 0.011  |
| Hispanic                                                | -0.023          | -1.04 | 0.30    | -0.067  | 0.021  | -0.026    | -1.17 | 0.24    | -0.070  | 0.018  |
| Other race-ethnicity                                    | -0.110          | -4.33 | <0.001  | -0.160  | -0.060 | -0.113    | -4.46 | <0.001  | -0.163  | -0.064 |
| <b>Diagnosis group (ref: major depressive disorder)</b> |                 |       |         |         |        |           |       |         |         |        |
| Bipolar disorder                                        | 0.151           | 9.33  | <0.001  | 0.119 - | 0.182  | 0.145     | 8.84  | <0.001  | 0.113 - | 0.177  |
| Schizoaffective disorder                                | 0.255           | 13.32 | <0.001  | 0.218 - | 0.293  | 0.247     | 12.64 | <0.001  | 0.209 - | 0.286  |
| <b>Substance use disorder</b>                           | 0.035           | 2.37  | 0.02    | 0.006 - | 0.063  | 0.032     | 2.19  | 0.03    | 0.003 - | 0.061  |
| <b>Medical comorbidity<sup>b</sup></b>                  | 0.097           | 6.11  | <0.001  | 0.066 - | 0.129  | 0.097     | 6.07  | <0.001  | 0.065 - | 0.128  |
| <b>Length-of-stay</b>                                   | -0.001          | -1.58 | 0.12    | -0.001  | 0.0001 | -0.001    | -1.47 | 0.14    | -0.001  | 0.0002 |
| <b>Hospital type</b>                                    |                 |       |         |         |        |           |       |         |         |        |
| Urban small hospital                                    | -0.033          | -1.85 | 0.07    | -0.069  | 0.002  | -0.031    | -1.72 | 0.09    | -0.066  | 0.004  |
| Non-urban hospital                                      | -0.090          | -3.13 | 0.002   | -0.146  | -0.033 | -0.087    | -3.03 | 0.002   | -0.143  | -0.031 |
| Hospital location unknown                               | 0.099           | 2.25  | 0.02    | 0.013   | 0.185  | 0.097     | 2.20  | 0.03    | 0.011 - | 0.183  |
| <b>Hospital delivers any inpatient ECT</b>              | -0.050          | -3.42 | 0.001   | -0.079  | -0.021 | -0.040    | -2.61 | 0.01    | -0.071  | -0.010 |
| <b>p</b>                                                |                 |       |         |         |        | 0.193     | 2.89  | 0.004   | 0.063 - | 0.317  |

<sup>a</sup>Regression models also included state fixed effects and a binary indicator for censored observations where discharge was within 30 days of the end of the calendar year.

<sup>b</sup>Equals 1 if the patient had an ICD-9 diagnosis code in any position for intracranial lesions/masses/inflammation/infection/hemorrhage, hemorrhagic stroke, myocardial infarction, dysrhythmias, malfunctioning cardiac device, valvular disease, heart failure, epilepsy, dementia, and other contraindications to anesthesia; 0 otherwise.

**eTable 3.** One-to-One Propensity Score Matching Estimate of the Average Treatment Effect of ECT on 30-Day Readmission Risk (N=4,940)

|                                            | <b>ECT<br/>(n=2,470)</b> | <b>No ECT<br/>(n=2,470)</b> | <b>Difference</b> | <b>SE</b> | <b>t-stat<br/>(P Value)</b> |
|--------------------------------------------|--------------------------|-----------------------------|-------------------|-----------|-----------------------------|
| Average treatment effect among the treated | 0.099                    | 0.092                       | 0.007             | 0.009     | 0.75<br>(0.23)              |

**eTable 4.** Thirty-Day Readmission Risk by Hospital ECT Prevalence Among Inpatients Who Were Not Administered ECT and Did Not Have a Major Depressive Disorder, Bipolar Disorder, or Schizoaffective Disorder Diagnosis

| <b>ECT Prevalence (%)</b>                                                     | <b>N</b>             | <b>Mean</b>                 |
|-------------------------------------------------------------------------------|----------------------|-----------------------------|
| Less than 1.0                                                                 | 283,528              | 7.5                         |
| 1 to 2                                                                        | 12,946               | 7.4                         |
| 2 to 3                                                                        | 4,832                | 8.1                         |
| 3 to 4                                                                        | 4,060                | 6.3                         |
| More than 4                                                                   | 3,482                | 6.4                         |
|                                                                               |                      |                             |
| Overall                                                                       | 308,848              | 7.5                         |
| <b>Pearson correlation between ECT prevalence and 30-day readmission risk</b> | <b>coef.<br/>(P)</b> | <b>-0.0006<br/>(0.7348)</b> |
